# Supplementary figures and images for: Using Sequence Similarity Based on CKSNP Features and a Graph Neural Network Model to Identify miRNA–Disease Associations
Source: MDPI journal article supplement (doi:10.3390/genes13101759), 2022-09-28

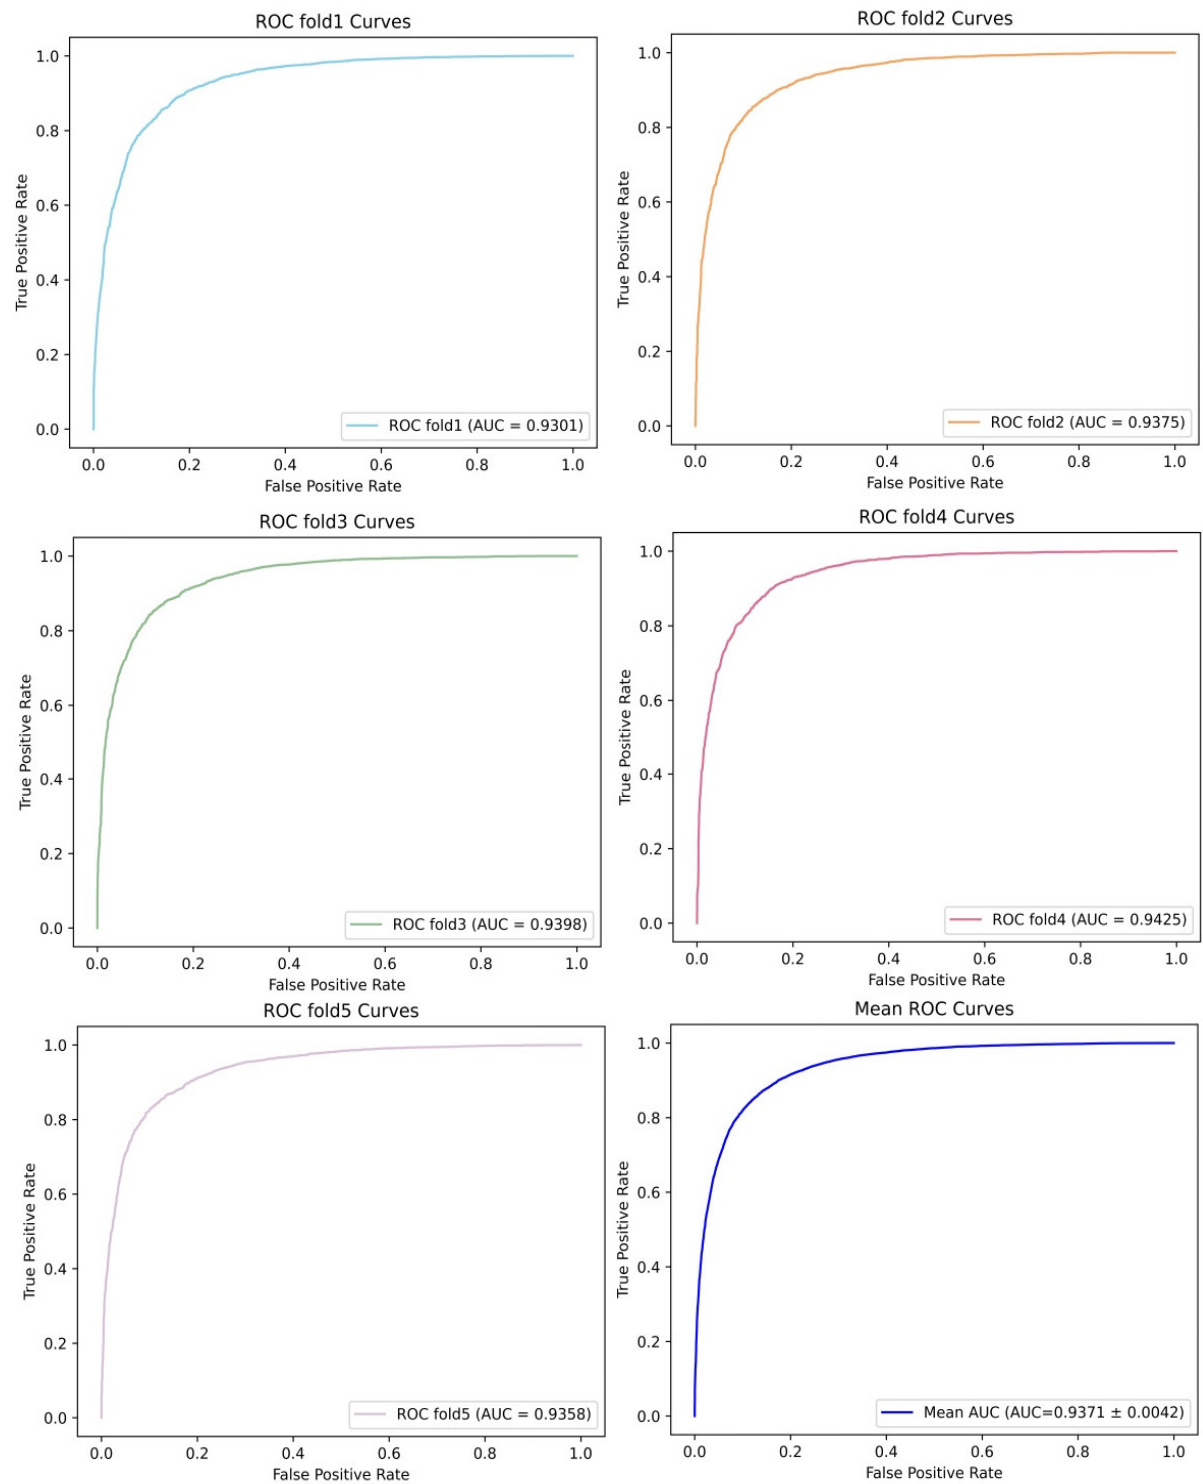

**Figure S1.** Receiver operating characteristic curve for each fold experiment.

Supplement: s1 [file s1]
